# Supplementary material
Source: PubMed Central journal article supplement (PMC7337414)
Supplement: NIHMS1601368-supplement-Appendix_tables.pdf [file NIHMS1601368-supplement-Appendix_tables.pdf]

**Appendix Table 1.** Results of Multiple Linear Regression of Absolute Handgrip Strength (kg) on Biomarker Outcomes Controlling for BMI in U.S. Adults, 2011-2012

|                                                    | Males |      |       |              | Females |      |       |              |
|----------------------------------------------------|-------|------|-------|--------------|---------|------|-------|--------------|
|                                                    | Est   | SE   | B     | t            | Est     | SE   | B     | t            |
| Systolic BP (mm·Hg) <sup>a</sup>                   | 0.01  | 0.02 | 0.01  | 0.43         | -0.01   | 0.04 | -0.01 | -0.28        |
| Diastolic BP (mm·Hg) <sup>a</sup>                  | 0.10  | 0.02 | 0.15  | <b>4.45*</b> | 0.15    | 0.03 | 0.16  | <b>5.71*</b> |
| TC (mg·dL <sup>-1</sup> ) <sup>a</sup>             | 0.24  | 0.06 | 0.11  | <b>3.96*</b> | 0.14    | 0.11 | 0.04  | 1.22         |
| HDL (mg·dL <sup>-1</sup> ) <sup>a</sup>            | -0.03 | 0.02 | -0.04 | -1.27        | 0.03    | 0.05 | 0.03  | 0.72         |
| LDL (mg·dL <sup>-1</sup> ) <sup>b</sup>            | 0.27  | 0.06 | 0.12  | <b>4.42*</b> | -0.07   | 0.19 | 0.01  | -0.38        |
| Trig (mg·dL <sup>-1</sup> ) <sup>b</sup>           | 0.16  | 0.25 | 0.05  | 0.63         | 0.07    | 0.27 | 0.01  | 0.24         |
| Plasma insulin (μU·mL <sup>-1</sup> ) <sup>b</sup> | 0.01  | 0.03 | 0.01  | 0.23         | -0.02   | 0.06 | -0.04 | -0.41        |
| Plasma glucose (mg·dL <sup>-1</sup> ) <sup>b</sup> | -0.07 | 0.06 | -0.05 | -1.14        | 0.03    | 0.11 | -0.04 | 0.24         |

*Notes:* All models control for race/Hispanic origin, age, statin medication use, physical activity, and BMI. Boldface indicates statistical significance \* $p < 0.01$

BP, blood pressure; TC, total cholesterol; HDL, high density lipoprotein cholesterol; LDL, low density lipoprotein cholesterol; Trig, Triglycerides

<sup>a</sup> Calculated using examination sample (n=4,221)

<sup>b</sup> Calculated using subsample with fasting data and corresponding fasting weights (n=1,923)

Source: NHANES

**Appendix Table 2.** Mean Values of Absolute Grip Strength (kg) Versus Relative Grip Strength (Strength/BMI) by Weight Status Within Sex and Age Groups in U.S. Adults, 2011-2012

| Age (years) | Weight status | Absolute handgrip strength |      |        |      | Relative handgrip strength |      |        |      |
|-------------|---------------|----------------------------|------|--------|------|----------------------------|------|--------|------|
|             |               | Male                       |      | Female |      | Male                       |      | Female |      |
|             |               | Mean                       | SE   | Mean   | SE   | Mean                       | SE   | Mean   | SE   |
| 20-29       | Normal        | 90.8                       | 1.74 | 56.6   | 0.83 | 4.1                        | 0.08 | 2.6    | 0.04 |
|             | Overweight    | 99.3                       | 1.77 | 59.9   | 0.79 | 3.7                        | 0.07 | 2.2    | 0.03 |
|             | Obese         | 100.0                      | 2.15 | 64.2   | 1.26 | 2.9                        | 0.08 | 1.8    | 0.04 |
| 30-39       | Normal        | 92.5                       | 1.77 | 59.3   | 1.18 | 4.1                        | 0.07 | 2.7    | 0.05 |
|             | Overweight    | 99.6                       | 1.76 | 62.3   | 1.62 | 3.7                        | 0.07 | 2.3    | 0.06 |
|             | Obese         | 102.0                      | 1.60 | 64.4   | 1.14 | 2.9                        | 0.04 | 1.7    | 0.04 |
| 40-49       | Normal        | 89.5                       | 1.66 | 61.3   | 1.34 | 3.9                        | 0.08 | 2.8    | 0.05 |
|             | Overweight    | 94.0                       | 1.51 | 58.8   | 1.56 | 3.4                        | 0.06 | 2.2    | 0.05 |
|             | Obese         | 96.2                       | 1.96 | 61.9   | 1.00 | 2.8                        | 0.05 | 1.7    | 0.04 |
| 50-59       | Normal        | 83.2                       | 2.22 | 54.1   | 1.51 | 3.7                        | 0.11 | 2.5    | 0.09 |
|             | Overweight    | 86.3                       | 2.13 | 57.5   | 1.45 | 3.2                        | 0.08 | 2.1    | 0.05 |
|             | Obese         | 91.5                       | 3.29 | 55.7   | 1.44 | 2.7                        | 0.12 | 1.5    | 0.04 |
| 60+         | Normal        | 71.7                       | 1.53 | 44.9   | 1.22 | 3.2                        | 0.08 | 2.0    | 0.06 |
|             | Overweight    | 78.0                       | 1.86 | 47.5   | 0.71 | 2.9                        | 0.08 | 1.7    | 0.03 |
|             | Obese         | 79.4                       | 1.59 | 50.3   | 0.80 | 2.3                        | 0.09 | 1.4    | 0.02 |

*Note:* Absolute grip strength calculated as combined maximum value (kg) of trials from both hands. Relative grip strength was calculated as absolute handgrip strength divided by BMI (calculated as weight in kilograms divided by height in meters squared). Normal (BMI<25); Overweight (30<BMI≥25); Obese (BMI≥30).

Source: NHANES
